# Supplementary material
Source: PubMed Central journal article supplement (PMC3483805)

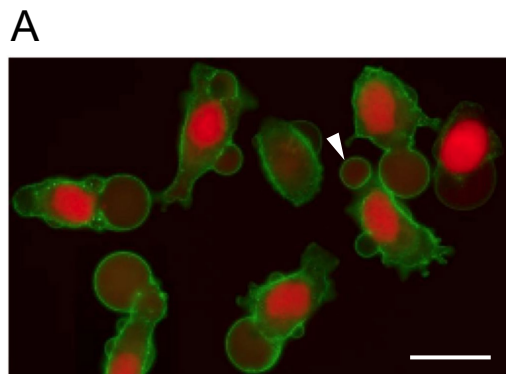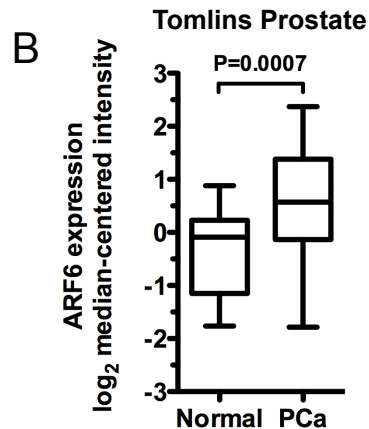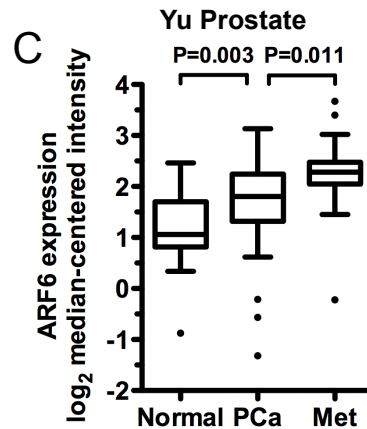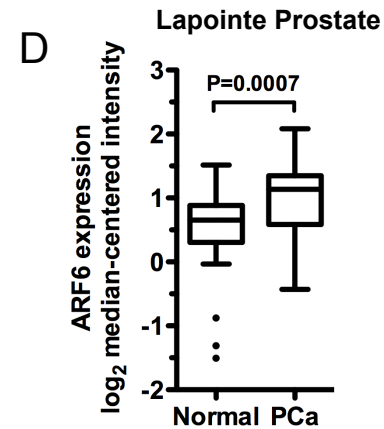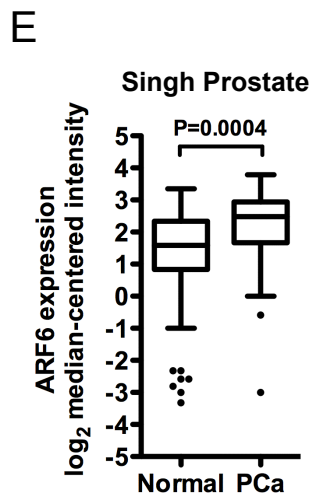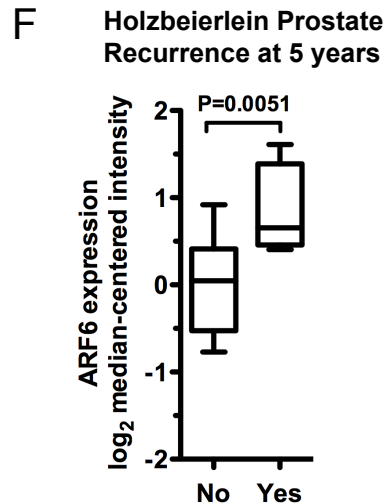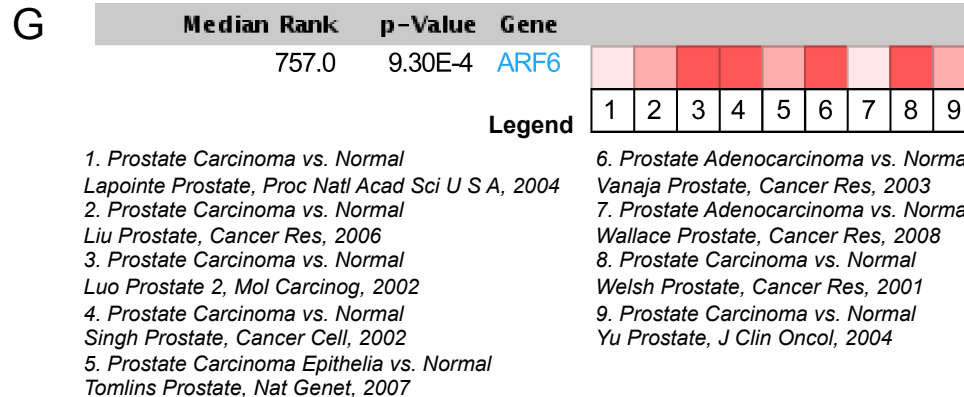

Supplement: mmc1.pdf [file mmc1.pdf]

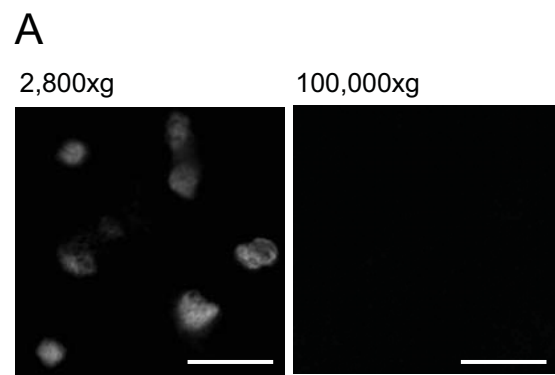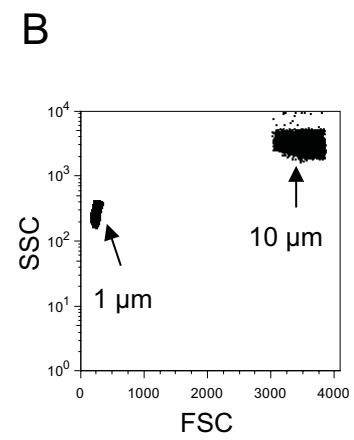

Supplement: mmc2.pdf [file mmc2.pdf]

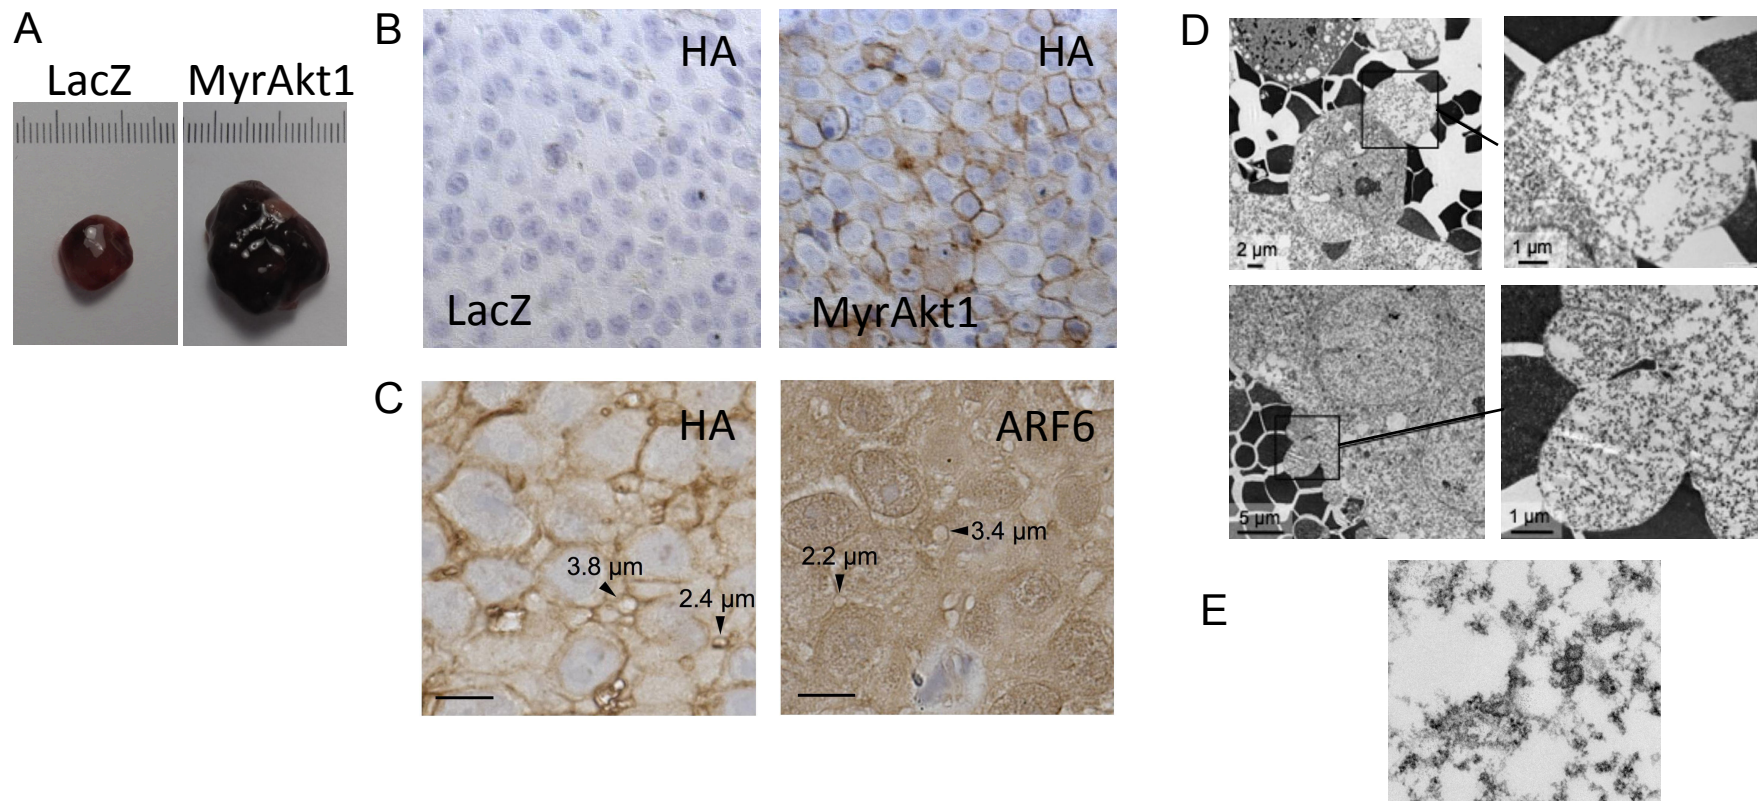

Supplementary Figure S3 Di Vizio et al.

Supplement: mmc3.pdf [file mmc3.pdf]

A

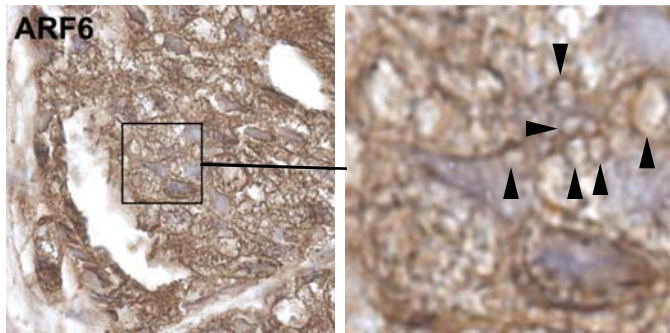

B

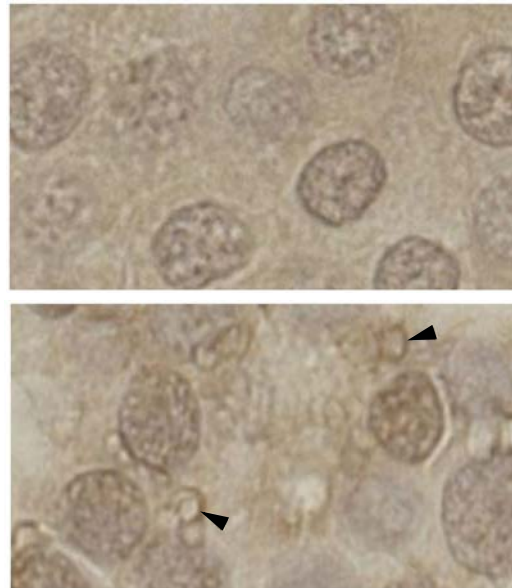

C

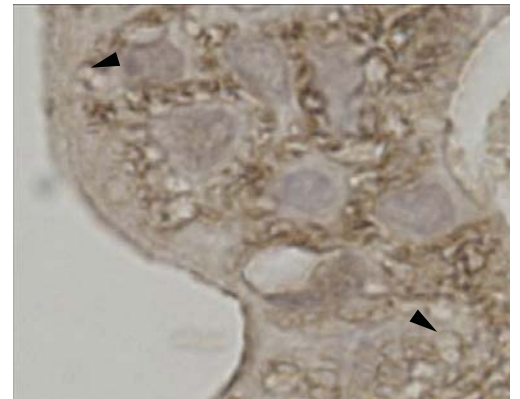

Supplement: mmc4.pdf [file mmc4.pdf]

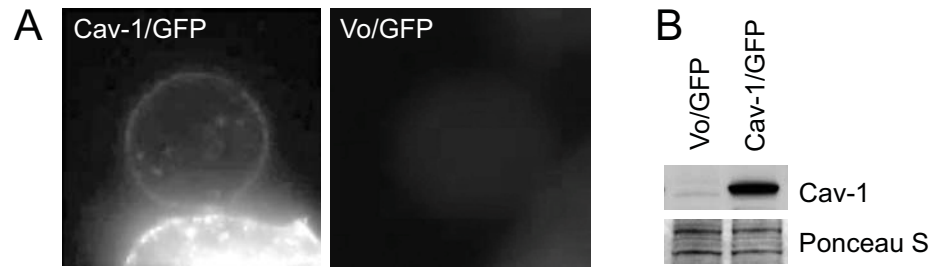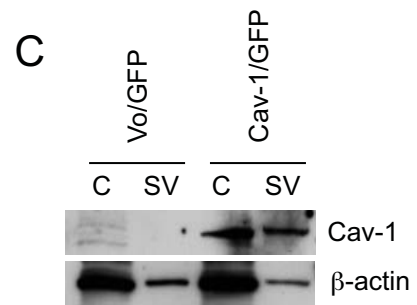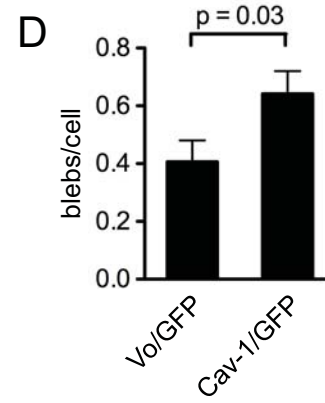

Supplement: mmc5.pdf [file mmc5.pdf]

A

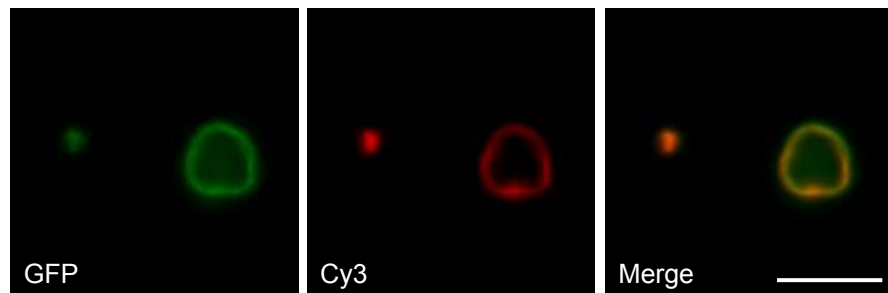

B

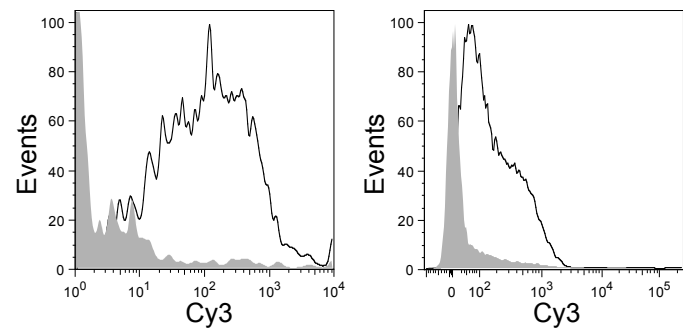

Supplement: mmc6.pdf [file mmc6.pdf]

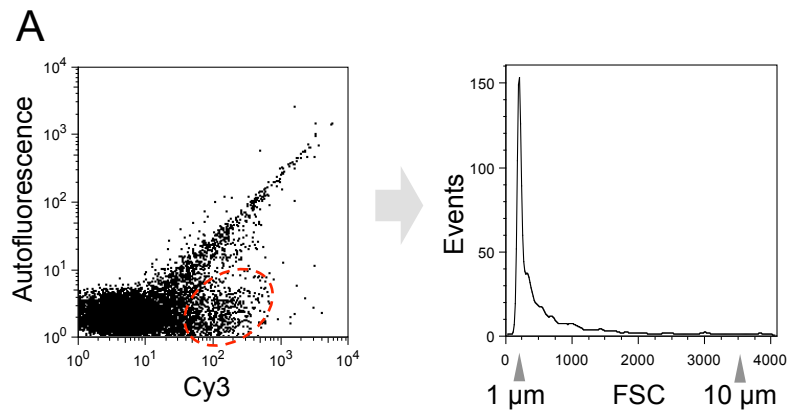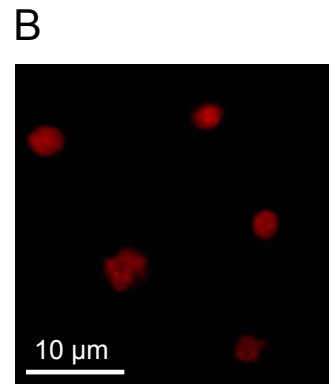

Supplement: mmc7.pdf [file mmc7.pdf]

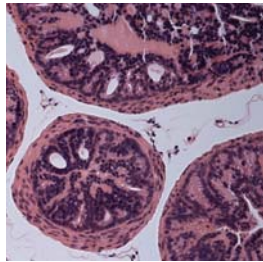

Benign

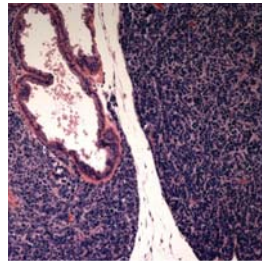

PCa

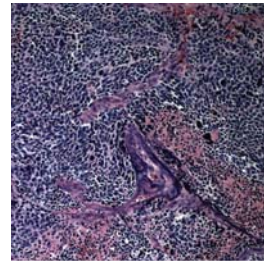

PCa/Met

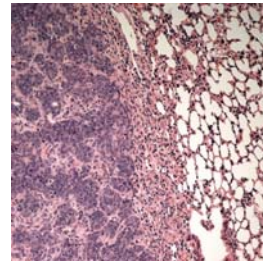

Met

Supplement: mmc8.pdf [file mmc8.pdf]

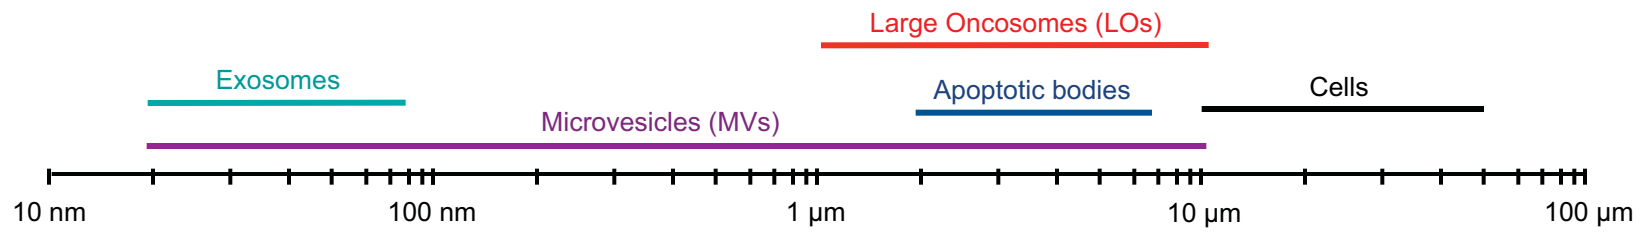

Supplement: mmc9.pdf [file mmc9.pdf]
